# Supplementary material for: The unexpected roles of σ and π orbitals in electron donor and acceptor group effects on the 13C NMR chemical shifts in substituted benzenes
Source: Royal Society of Chemistry journal article supplement (doi:10.1039/c7sc02163a), 2017-01-01
Supplement: c7sc02163a1.pdf [file c7sc02163a1.pdf]

*Supplementary Information for 'The unexpected roles of  $\sigma$  and  $\pi$  orbitals in electron donor and acceptor group effects on the  $^{13}\text{C}$  NMR chemical shifts in substituted benzenes'*

## 1 Experimental $^{13}\text{C}$ NMR chemical shifts

**Table S1:** Experimental carbon 1  $^{13}\text{C}$  NMR chemical shifts<sup>a,b</sup> for R group in *ortho* (*o*-), *meta* (*m*-), and *para* (*p*-) position related to C1 of R-benzene compounds in  $\text{CDCl}_3$  and  $\text{DMSO-}d_6$ .

| Solvent           | H      | R                         |                           |                           |                           |                           |                           |
|-------------------|--------|---------------------------|---------------------------|---------------------------|---------------------------|---------------------------|---------------------------|
|                   |        | <i>o</i> -NH <sub>2</sub> | <i>m</i> -NH <sub>2</sub> | <i>p</i> -NH <sub>2</sub> | <i>o</i> -NO <sub>2</sub> | <i>m</i> -NO <sub>2</sub> | <i>p</i> -NO <sub>2</sub> |
| $\text{CDCl}_3$   | 128.55 | 115.29                    | 129.45                    | 118.73                    | 123.65                    | 129.48                    | 134.76                    |
| $\text{DMSO-}d_6$ | 128.25 | 113.84                    | 128.76                    | 115.61                    | 123.22                    | 129.77                    | 135.19                    |

<sup>a</sup> in ppm. <sup>b</sup> Experimental error is 0.1 ppm.

## 2 Individual contributions of the C1 shielding

Table S2 displays the decomposition of the C1 isotropic NMR shielding constants into the diamagnetic and paramagnetic contributions.

**Table S2:** The C1 shielding ( $\sigma_{\text{total}}$ <sup>a,b</sup>) and the diamagnetic ( $\sigma_{\text{dia}}$ <sup>a</sup>) and paramagnetic ( $\sigma_{\text{para}}$ <sup>a</sup>) contributions obtained for R-benzene compounds.

|                         | H       | R                         |                           |                           |                           |                           |                           |
|-------------------------|---------|---------------------------|---------------------------|---------------------------|---------------------------|---------------------------|---------------------------|
|                         |         | <i>o</i> -NH <sub>2</sub> | <i>m</i> -NH <sub>2</sub> | <i>p</i> -NH <sub>2</sub> | <i>o</i> -NO <sub>2</sub> | <i>m</i> -NO <sub>2</sub> | <i>p</i> -NO <sub>2</sub> |
| $\sigma_{\text{dia}}$   | 241.87  | 242.72                    | 241.04                    | 242.10                    | 241.44                    | 241.50                    | 241.66                    |
| $\sigma_{\text{para}}$  | -187.99 | -173.47                   | -188.27                   | -175.65                   | -184.24                   | -187.96                   | -195.96                   |
| $\sigma_{\text{total}}$ | 53.88   | 69.25                     | 52.77                     | 66.45                     | 57.20                     | 53.54                     | 45.70                     |

<sup>a</sup> in ppm. <sup>b</sup>  $\sigma_{\text{total}} = \sigma_{\text{dia}} + \sigma_{\text{para}}$ .

### 3 NLMO contributions to the C1 shielding

NLMO contributions for diamagnetic and paramagnetic terms of the C1 shielding are displayed in Table S3 and S4, respectively, for R-benzenes.

**Table S3:** NLMO contributions<sup>a</sup> to  $\sigma_{\text{dia}}$  term of the C1 shielding for R-benzenes.

| Parent<br>NBO                      | R      |                           |                           |                           |                           |                           |                           |
|------------------------------------|--------|---------------------------|---------------------------|---------------------------|---------------------------|---------------------------|---------------------------|
|                                    | H      | <i>o</i> -NH <sub>2</sub> | <i>m</i> -NH <sub>2</sub> | <i>p</i> -NH <sub>2</sub> | <i>o</i> -NO <sub>2</sub> | <i>m</i> -NO <sub>2</sub> | <i>p</i> -NO <sub>2</sub> |
| CR (C1)                            | 203.54 | 203.50                    | 203.54                    | 203.50                    | 203.55                    | 203.54                    | 203.55                    |
| CR (C2-C6) <sup>b</sup>            | 0.03   | 0.04                      | 0.04                      | 0.04                      | 0.03                      | 0.03                      | 0.03                      |
| CR (N)                             | -      | 0.00                      | 0.00                      | 0.00                      | 0.00                      | 0.00                      | 0.00                      |
| CR (O) <sup>c</sup>                | -      | -                         | -                         | -                         | 0.00                      | 0.00                      | 0.00                      |
| LP (N)                             | -      | 0.57                      | 0.09                      | 0.24                      | -                         | -                         | -                         |
| LP <sub>1</sub> (O) <sup>c</sup>   | -      | -                         | -                         | -                         | 0.73                      | 0.41                      | 0.32                      |
| LP <sub>2</sub> (O) <sup>c</sup>   | -      | -                         | -                         | -                         | -0.40                     | -0.15                     | -0.14                     |
| LP <sub>3</sub> (O)                | -      | -                         | -                         | -                         | 0.07                      | 0.01                      | 0.02                      |
| $\sigma_{\text{C1-C2}}$            | 7.79   | 6.77                      | 7.23                      | 7.60                      | 5.56                      | 7.30                      | 7.91                      |
| $\sigma_{\text{C1-C6}}$            | 7.79   | 8.47                      | 7.86                      | 7.60                      | 8.46                      | 7.66                      | 7.91                      |
| $\sigma_{\text{C2-C3}}$            | 0.39   | 0.50                      | 0.41                      | 0.33                      | 0.66                      | 0.25                      | 0.32                      |
| $\sigma_{\text{C3-C4}}$            | -0.12  | -0.12                     | -0.04                     | -0.04                     | -0.12                     | -0.01                     | -0.09                     |
| $\sigma_{\text{C4-C5}}$            | -0.12  | -0.12                     | -0.14                     | -0.04                     | -0.13                     | -0.14                     | -0.09                     |
| $\sigma_{\text{C5-C6}}$            | 0.39   | 0.45                      | 0.35                      | 0.33                      | 0.41                      | 0.37                      | 0.32                      |
| $\pi_{\text{C-C}}$ <sup>d</sup>    | 18.87  | 19.47                     | 18.77                     | 19.36                     | 18.42                     | 18.86                     | 18.29                     |
| $\sigma_{\text{C1-H}}$             | 2.30   | 2.81                      | 2.16                      | 2.32                      | 3.23                      | 2.39                      | 2.26                      |
| $\sigma_{\text{C2-H}}$             | 0.40   | -                         | 0.46                      | 0.39                      | -                         | 0.46                      | 0.41                      |
| $\sigma_{\text{C2-R}}$             | -      | -0.02                     | -                         | -                         | 0.32                      | -                         | -                         |
| $\sigma_{\text{C3-H}}$             | 0.08   | 0.08                      | -                         | 0.12                      | 0.07                      | -                         | 0.12                      |
| $\sigma_{\text{C3-R}}$             | -      | -                         | -0.06                     | -                         | -                         | 0.07                      | -                         |
| $\sigma_{\text{C4-H}}$             | 0.05   | 0.05                      | 0.07                      | -                         | 0.05                      | 0.08                      | -                         |
| $\sigma_{\text{C4-R}}$             | -      | -                         | -                         | -0.04                     | -                         | -                         | 0.05                      |
| $\sigma_{\text{C5-H}}$             | 0.08   | 0.08                      | 0.06                      | 0.12                      | 0.06                      | 0.06                      | 0.12                      |
| $\sigma_{\text{C6-H}}$             | 0.40   | 0.37                      | 0.41                      | 0.39                      | 0.40                      | 0.38                      | 0.41                      |
| $\sigma_{\text{N-H}}$ <sup>e</sup> | -      | -0.18                     | -0.17                     | -0.12                     | -                         | -                         | -                         |
| $\sigma_{\text{N-O}}$ <sup>f</sup> | -      | -                         | -                         | -                         | -0.22                     | -0.11                     | -0.10                     |
| $\pi_{\text{N-O}}$                 | -      | -                         | -                         | -                         | 0.29                      | 0.04                      | 0.04                      |
| $\sum_{\text{total}}$ <sup>g</sup> | 241.87 | 242.72                    | 241.04                    | 242.10                    | 241.44                    | 241.50                    | 241.66                    |

<sup>a</sup> in ppm. <sup>b</sup> Sum of core carbon 2-6 contributions. <sup>c</sup> Sum of contributions from two oxygen atoms. <sup>d</sup> Sum of three  $\pi$  orbitals. <sup>e</sup> Sum of  $\sigma_{\text{N-H}}$  contributions. <sup>f</sup> Sum of  $\sigma_{\text{N-O}}$  contributions. <sup>g</sup> Sum of all NLMO contributions.

**Table S4:** NLMO contributions<sup>a</sup> to  $\sigma_{\text{para}}$  term of the C1 shielding for R-benzenes.

| Parent<br>NBO                        | R       |                           |                           |                           |                           |                           |                           |
|--------------------------------------|---------|---------------------------|---------------------------|---------------------------|---------------------------|---------------------------|---------------------------|
|                                      | H       | <i>o</i> -NH <sub>2</sub> | <i>m</i> -NH <sub>2</sub> | <i>p</i> -NH <sub>2</sub> | <i>o</i> -NO <sub>2</sub> | <i>m</i> -NO <sub>2</sub> | <i>p</i> -NO <sub>2</sub> |
| CR (C1)                              | 0.01    | 0.02                      | 0.01                      | 0.01                      | 0.02                      | 0.01                      | 0.01                      |
| CR (C2-C6) <sup>b</sup>              | -0.94   | -0.94                     | -0.94                     | -0.85                     | -1.05                     | -0.91                     | -0.82                     |
| CR (N)                               | -       | -0.01                     | 0.00                      | 0.00                      | -0.01                     | -0.01                     | 0.00                      |
| CR (O) <sup>c</sup>                  | -       | -                         | -                         | -                         | -0.04                     | -0.03                     | -0.02                     |
| LP (N)                               | -       | -0.06                     | -0.63                     | -0.01                     | -                         | -                         | -                         |
| LP <sub>1</sub> (O) <sup>c</sup>     | -       | -                         | -                         | -                         | -1.04                     | -0.35                     | -0.42                     |
| LP <sub>2</sub> (O) <sup>c</sup>     | -       | -                         | -                         | -                         | -2.40                     | -0.30                     | -0.16                     |
| LP <sub>3</sub> (O)                  | -       | -                         | -                         | -                         | -0.68                     | -0.30                     | -0.22                     |
| $\sigma_{\text{C1-C2}}$              | -56.14  | -52.61                    | -58.36                    | -50.95                    | -60.91                    | -59.07                    | -54.35                    |
| $\sigma_{\text{C1-C6}}$              | -56.14  | -51.60                    | -54.71                    | -50.95                    | -51.11                    | -49.31                    | -54.35                    |
| $\sigma_{\text{C2-C3}}$              | -2.26   | -2.70                     | -2.05                     | -2.39                     | -2.99                     | -2.43                     | -2.66                     |
| $\sigma_{\text{C3-C4}}$              | -0.15   | -0.08                     | -0.32                     | -0.29                     | 0.05                      | -0.33                     | -0.27                     |
| $\sigma_{\text{C4-C5}}$              | -0.15   | 0.00                      | -0.37                     | -0.29                     | 0.06                      | -0.42                     | -0.27                     |
| $\sigma_{\text{C5-C6}}$              | -2.26   | -2.02                     | -2.08                     | -2.39                     | -1.65                     | -2.16                     | -2.66                     |
| $\pi_{\text{C-C}}$ <sup>d</sup>      | -3.44   | -2.42                     | -2.11                     | -1.88                     | -2.13                     | -3.19                     | -4.21                     |
| $\sigma_{\text{C1-H}}$               | -58.62  | -52.67                    | -59.10                    | -58.16                    | -55.47                    | -62.75                    | -69.69                    |
| $\sigma_{\text{C2-H}}$               | -3.30   | -                         | -3.34                     | -3.22                     | -                         | -2.99                     | -3.07                     |
| $\sigma_{\text{C2-R}}$               | -       | -2.47                     | -                         | -                         | -1.35                     | -                         | -                         |
| $\sigma_{\text{C3-H}}$               | -0.48   | -0.26                     | -                         | -0.42                     | -0.71                     | -                         | -0.08                     |
| $\sigma_{\text{C3-R}}$               | -       | -                         | -0.32                     | -                         | -                         | 0.00                      | -                         |
| $\sigma_{\text{C4-H}}$               | -0.34   | -0.36                     | -0.33                     | -                         | -0.39                     | -0.34                     | -                         |
| $\sigma_{\text{C4-R}}$               | -       | -                         | -                         | -0.28                     | -                         | -                         | 0.03                      |
| $\sigma_{\text{C5-H}}$               | -0.48   | -0.73                     | -0.43                     | -0.42                     | -0.59                     | -0.30                     | -0.08                     |
| $\sigma_{\text{C6-H}}$               | -3.30   | -2.94                     | -3.17                     | -3.22                     | -2.79                     | -3.25                     | -3.05                     |
| $\sigma_{\text{N-H}}$ <sup>e</sup>   | -       | -1.62                     | -0.02                     | 0.06                      | -                         | -                         | -                         |
| $\sigma_{\text{N-O}}$ <sup>f</sup>   | -       | -                         | -                         | -                         | 0.27                      | 0.21                      | 0.16                      |
| $\pi_{\text{N-O}}$                   | -       | -                         | -                         | -                         | 0.67                      | 0.26                      | 0.22                      |
| $\Sigma_{\text{total}}$ <sup>g</sup> | -187.99 | -173.47                   | -188.27                   | -175.65                   | -184.24                   | -187.96                   | -195.96                   |

<sup>a</sup> in ppm. <sup>b</sup> Sum of core carbon 2-6 contributions. <sup>c</sup> Sum of contributions from two oxygen atoms. <sup>d</sup> Sum of three  $\pi$  orbitals. <sup>e</sup> Sum of  $\sigma_{\text{N-H}}$  contributions. <sup>f</sup> Sum of  $\sigma_{\text{N-O}}$  contributions. <sup>g</sup> Sum of all NLMO contributions.

**Table S5:** Atomic hybrid contributions (%) of C1 and C2 to the  $\sigma_{C1-C2}$  NLMO for R-benzene.

|     | R     |                           |                           |                           |                           |                           |                           |
|-----|-------|---------------------------|---------------------------|---------------------------|---------------------------|---------------------------|---------------------------|
|     | H     | <i>o</i> -NH <sub>2</sub> | <i>m</i> -NH <sub>2</sub> | <i>p</i> -NH <sub>2</sub> | <i>o</i> -NO <sub>2</sub> | <i>m</i> -NO <sub>2</sub> | <i>p</i> -NO <sub>2</sub> |
| %C1 | 49.67 | 48.89                     | 49.17                     | 49.50                     | 48.57                     | 48.93                     | 49.56                     |
| %C2 | 49.67 | 50.24                     | 50.04                     | 49.81                     | 50.62                     | 50.14                     | 49.79                     |

**Table S6:** Atomic hybrid contributions (%) of C1 and C6 to the  $\sigma_{C1-C6}$  NLMO for R-benzene.

|     | R     |                           |                           |                           |                           |                           |                           |
|-----|-------|---------------------------|---------------------------|---------------------------|---------------------------|---------------------------|---------------------------|
|     | H     | <i>o</i> -NH <sub>2</sub> | <i>m</i> -NH <sub>2</sub> | <i>p</i> -NH <sub>2</sub> | <i>o</i> -NO <sub>2</sub> | <i>m</i> -NO <sub>2</sub> | <i>p</i> -NO <sub>2</sub> |
| %C1 | 49.67 | 50.05                     | 49.81                     | 49.50                     | 50.15                     | 49.79                     | 49.56                     |
| %C6 | 49.67 | 49.16                     | 49.49                     | 49.81                     | 48.92                     | 49.56                     | 49.79                     |

**Table S7:** Atomic hybrid contributions (%) of C1 and H to the  $\sigma_{C1-H}$  NLMO for R-benzene.

|     | R     |                           |                           |                           |                           |                           |                           |
|-----|-------|---------------------------|---------------------------|---------------------------|---------------------------|---------------------------|---------------------------|
|     | H     | <i>o</i> -NH <sub>2</sub> | <i>m</i> -NH <sub>2</sub> | <i>p</i> -NH <sub>2</sub> | <i>o</i> -NO <sub>2</sub> | <i>m</i> -NO <sub>2</sub> | <i>p</i> -NO <sub>2</sub> |
| %C1 | 61.07 | 60.88                     | 60.98                     | 60.99                     | 62.32                     | 61.59                     | 61.46                     |
| %H  | 37.95 | 38.14                     | 38.01                     | 38.02                     | 36.56                     | 37.40                     | 37.55                     |
